# Supplementary material for: Selenium-enriched peptides identified from selenium-enriched soybean protein hydrolysate: protective effects against heat damage in Caco-2 cells
Source: Royal Society of Chemistry journal article supplement (doi:10.1039/d3fo01103h), 2023-01-01
Supplement: d3fo01103h1.pdf [file d3fo01103h1.pdf]

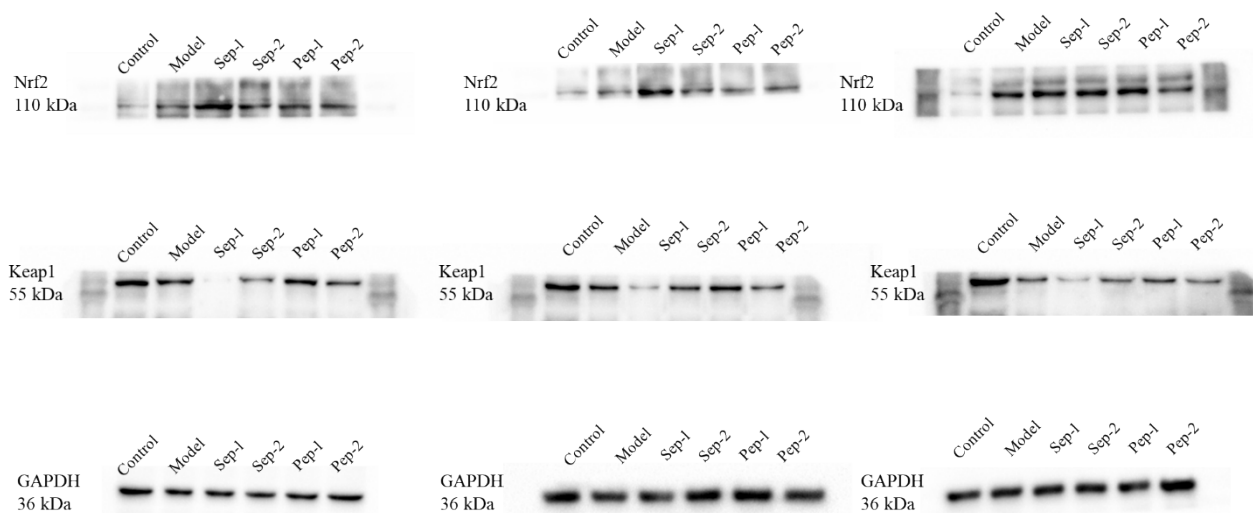

Fig.S1 The original picture of protein data of Nrf2 signaling pathway

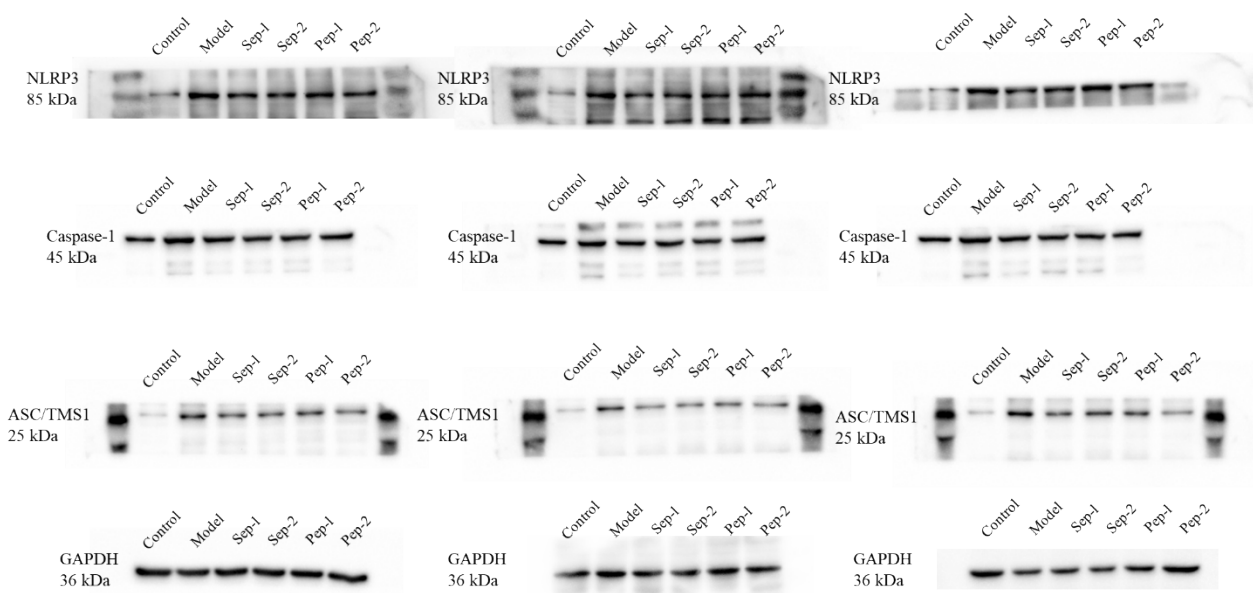

Fig.S2 The original picture of protein data of NLRP3 signaling pathway
